# Supplementary material for: The Role of Sugar Transporter CsSWEET7a in Apoplasmic Phloem Unloading in Receptacle and Nectary During Cucumber Anthesis
Source: Front Plant Sci. 2022 Jan 31;12:758526. doi: 10.3389/fpls.2021.758526 (PMC8841823; doi:10.3389/fpls.2021.758526)
Supplement: Supplementary Table 1 — Primers used in this study. [file Table_1.XLSX]

## Sheet: Supplemental Table1
Supplemental Table 1 Primers used in this study
Gene name	Gene ID	Primer name	Sequence (5’- -3’)
CsSWEET7a	Csa4G054810	SWEET7a F	ATGGTTTCTTTGGTGCTTGCC
		SWEET7a R	TCAAGCTCCATGGACCTCAG
CsAGA1	Csa4G631570	AGA1 F	GTCTTCATCCTATGGCCGAATA
		AGA1 R	ATAGAACCATCATGGAGCACAA
CsSUS4	Csa5G322500	SUS4 F	GAGGCAATGAATTGTGGTCTAC
		SUS4 R	GATCAATTTGGAAGCCAGAGAC
CsCINV1	Csa5G615240	CINV1 F	CTCACAGTTGCATGCATAAAGA
		CINV1 R	TTGACCATGTTTGAAATAGGCG
CsCWINV4	Csa2G351670	CWINV4 F	GAATTTAGCAATACCCGCCAAT
		CWINV4 R	CAAGCTGTAGTTGGGTCTCTAA
Tubulin	Csa4G000580	Tubulin F	ACGCTGTTGGTGGTGGTAC
		Tubulin R	GAGAGGGGTAAACAGTGAATC
